# Supplementary material
Source: Research Square preprint supplement (doi:10.21203/rs.3.rs-8970909/v1)
Supplement: Supplementary file 1 [file 44785235975f6b9a5b9e4932.xlsx]

## Sheet: High_het_genes
CHROM	Bin (s)	Region_start	Region_end	Gene	ORF	Gene start	Gene End	Description
chr3	359	1790001	1795000
chr4	240	1195001	1200000	HOK-4		1194594	1200844	Repeat sequence of about 8 kb, part of the Major Repeat Sequence (MRS) on Chromosome 4; MRS units are found on most chromosomes; may serve as recombination hotspots
chr4	240	1195001	1200000	MRS-4		1194594	1208847	Major Repeat Sequence (MRS) on Chromosome 4; MRS units are composed of variable numbers of RPS units flanked by HOK and RB2 sequences; found on most chromosomes; may serve as recombination hot spot
chr4	240	1195001	1200000	Ca3-4		1198515	1195555	Ca3 region on Chromosome 4; Ca3 is a large dispersed repeat sequence utilized as species-specific and strain-specific RFLP probe
chr6	39-41	190001	205000	CAN1	orf19.97	191106	192821	Basic amino acid permease; complements lysine transport mutation; 10 predicted transmembrane regions, 3 predicted N-glycosylation sites; phagocytosis by macrophages induces transcript; rat catheter, Spider and flow model biofilm induced
chr6	39-41	190001	205000	HAL21	orf19.99	194044	193016	Putative phosphoadenosine-5'-phosphate or 3'-phosphoadenosine 5'-phosphosulfate phosphatase; possible role in sulfur recycling; ortholog of S. cerevisiae Met22; predicted Kex2 substrate; F-12/CO2 biofilm induced
chr6	39-41	190001	205000		orf19.100	195350	194298	Alpha/beta hydrolase and lipase domain protein; Hap43-repressed; Spider and flow model biofilm induced
chr6	39-41	190001	205000	RIM9	orf19.101	195973	197013	Protein required for alkaline pH response via the Rim101 signaling pathway; ortholog of S. cerevisiae Rim9 and A. nidulans palI; Spider biofilm induced
chr6	39-41	190001	205000		orf19.102	198335	197085	Protein of unknown function
chr6	39-41	190001	205000	KAR5	orf19.103	198735	199112	Ortholog of S. cerevisiae Kar5; involved in nuclear membrane fusion during karyogamy; induced by alpha factor
chr6	39-41	190001	205000		orf19.104	199311	200165	Protein of unknown function; induced by alpha pheromone in SpiderM medium
chr6	39-41	190001	205000	HAL22	orf19.105	200573	201649	Putative phosphoadenosine-5'-phosphate or 3'-phosphoadenosine 5'-phosphosulfate phosphatase; possible role in sulfur recycling; Hap43-repressed; F-12/CO2 biofilm induced
chr6	39-41	190001	205000	JA2	orf19.107	204200	201705	DEAH-box ATP-dependent RNA helicase, required for 18S rRNA synthesis; rat catheter biofilm induced
chr6	39-41	190001	205000	MSY1	orf19.109	204422	205927	Probable mitochondrial tyrosyl-tRNA synthetase, based on conservation in other fungi
chr6	160	795001	800000	ALS1	orf19.5741	791472	795254	Cell-surface adhesin; adhesion, virulence, immunoprotective roles; band at hyphal base; Rfg1, Ssk1, Spider biofilm induced; flow model biofilm repressed; CAI-4 strain background effects; promoter bound Bcr1, Tec1, Efg1, Ndt80, and Brg1
chr6	160	795001	800000	ALS9	orf19.5742	798023	803695	ALS family cell-surface glycoprotein; expressed during infection of human epithelial cells; confers laminin adhesion to S. cerevisiae; highly variable; putative GPI-anchor; Hap43-repressed
chr6	175	870001	875000	Ca3-6	Ca3-6	871021	873991	Ca3 region on Chromosome 6; Ca3 is a large dispersed repeat sequence utilized as species-specific and strain-specific RFLP probe
chr6	175	870001	875000	MRS-6	MRS-6	875345	860702	Major Repeat Sequence (MRS) on Chromosome 6; MRS units are composed of variable numbers of RPS units flanked by HOK and RB2 sequences; found on most chromosomes; may serve as recombination hot spot
chr6	175	870001	875000	HOK-6	HOK-6	875345	868718	Repeat sequence of about 8 kb, part of the Major Repeat Sequence (MRS) on Chromosome 6; MRS units are found on most chromosomes; may serve as recombination hotspots
chr7	48	235001	240000	RPS-7a	RPS-7a	235831	234472	Repeat sequence of about 2 kb on Chromosome 7, about 60 copies are found in tandem repeats on most chromosomes; RPS units flanked by conserved HOK and RB2 sequences form Major Repeat Sequence (MRS); may serve as recombination hot spot
chr7	48	235001	240000	orf19.6897	orf19.6897	236562	236122	Protein of unknown function
chr7	48	235001	240000	Ca3-7b	Ca3-7b	238180	241119	Ca3 region on Chromosome 7; Ca3 is a large dispersed repeat sequence utilized as species-specific and strain-specific RFLP probe
chr7	48	235001	240000	MRS-7a	MRS-7a	242081	228342	Major Repeat Sequence (MRS) on Chromosome 7; MRS units are composed of variable numbers of RPS units flanked by HOK and RB2 sequences; found on most chromosomes; may serve as recombination hot spot
chr7	48	235001	240000	HOK-7a	HOK-7a	242081	235831	Repeat sequence of about 8 kb, part of the Major Repeat Sequence (MRS) on Chromosome 7; MRS units are found on most chromosomes; may serve as recombination hotspots
chr7	116	575001	580000	HOK-7b	HOK-7b	575244	581524	Repeat sequence of about 8 kb, part of the Major Repeat Sequence (MRS) on Chromosome 7; MRS units are found on most chromosomes; may serve as recombination hotspots
chr7	116	575001	580000	MRS-7b	MRS-7b	575244	589534	Major Repeat Sequence (MRS) on Chromosome 7; MRS units are composed of variable numbers of RPS units flanked by HOK and RB2 sequences; found on most chromosomes; may serve as recombination hot spot
chr7	116	575001	580000	Ca3-7a	Ca3-7a	579185	576205	Ca3 region on Chromosome 7; Ca3 is a large dispersed repeat sequence utilized as species-specific and strain-specific RFLP probe
chrR	272	1355001	1360000	Ca3-R	Ca3-R	1356455	1359423	Ca3 region on Chromosome R; Ca3 is a large dispersed repeat sequence utilized as species-specific and strain-specific RFLP probe
chrR	272	1355001	1360000	MRS-R	MRS-R	1360373	1346455	Major Repeat Sequence (MRS) on Chromosome R; MRS units are composed of variable numbers of RPS units flanked by HOK and RB2 sequences; found on most chromosomes; may serve as recombination hot spot
chrR	272	1355001	1360000	HOK-R	HOK-R	1360373	1354125	Repeat sequence of about 8 kb, part of the Major Repeat Sequence (MRS) on Chromosome R; MRS units are found on most chromosomes; may serve as recombination hotspots

## Sheet: Low_het_genes
Chromosome	Bin(s)	Region_start	Region_end	Gene	ORF	Gene start	Gene End	Description
chr1	11-13	60001	65000	HBR1	orf19.6074	49998	50744	Essential protein involved in regulation of MTL gene expression; hemoglobin-regulated inhibitor of white-opaque switching, may affect survival in host; activator of MTLalpha1 and MTLalpha2; transcript activated by hemoglobin
chr1	11-13	60001	65000	HMX1	orf19.6073	51682	50807	Heme oxygenase; utilization of hemin iron; transcript induced by heat, low iron, or hemin; repressed by Efg1; induced by low iron; upregulated by Rim101 at pH 8; Hap43-induced; Spider and flow model biofilm induced
chr1	11-13	60001	65000	CDC13	orf19.6072	53100	54443	Essential protein with similarity to S. cerevisiae Cdc13p, involved in telomere maintenance
chr1	11-13	60001	65000		orf19.6072.1	54559	54843	Protein of unknown function
chr1	11-13	60001	65000		orf19.6072.1	57075	57075	Protein of unknown function
chr1	11-13	60001	65000	ENA2	orf19.6070	59350	62553	Putative sodium transporter; induced by ciclopirox olamine; alkaline induced by Rim101; repressed by high-level peroxide stress; induced in oral candidiasis clinical isolates; possibly essential gene; rat catheter and Spider biofilm induced
chr1	11-13	60001	65000	SVF1	orf19.6068	63203	64351	Putative survival factor; stationary phase enriched protein; fluconazole-induced; regulated by Gcn4p; repressed in response to amino acid starvation (3-AT treatment); fungal-specific (no human or murine homolog)
chr1	11-13	60001	65000		orf19.6066	66325	64697	Hexadecenal dehydrogenase; involved in the conversion of sphingosine 1-phosphate breakdown product hexadecenal to hexadecenoic acid; Spider biofilm induced
chr2	107	530001	535000		orf19.1589	530098	531411	Putative transcription factor component of the core factor (CF) rDNA transcription factor complex; Spider biofilm induced
chr2	107	530001	535000		orf19.1589.1	533492	532131	Protein of unknown function
chr2	107	530001	535000		orf19.5842	535636	534851	Protein with predicted siroheme synthase middle domains NAD(P)-binding; Hap43-repressed gene
chr3	275-278	1370001	1390000	NOG1	orf19.7384	1370294	1372216	Putative GTPase; mutation confers hypersensitivity to 5-fluorocytosine (5-FC), 5-fluorouracil (5-FU), and tubercidin (7-deazaadenosine); repressed by prostaglandins; Hap43-induced
chr3	275-278	1370001	1390000		orf19.7385	1373821	1375326	CCCH zinc finger protein; Spider biofilm induced
chr3	275-278	1370001	1390000		orf19.7386	1376387	1375512	Protein of unknown function
chr3	275-278	1370001	1390000	ELP3	orf19.7387	1376656	1378299	Predicted histone acetyltransferase; role in regulation of transcription, tRNA wobble uridine modification; Spider biofilm induced
chr3	275-278	1370001	1390000	PBS2	orf19.7388	1380059	1378422	MAPK kinase (MAPKK); role in osmotic and oxidative stress responses, oxidative stress adaptation; required for stress regulation of Hog1p localization and activity; functional homolog of S. cerevisiae Pbs2p
chr3	275-278	1370001	1390000	REV3	orf19.7389	1380646	1385538	Protein of unknown function
chr3	275-278	1370001	1390000	OCH1	orf19.7391	1386772	1385615	Alpha-1,6-mannosyltransferase; initiates N-glycan outer chain branch addition; similar to S. cerevisiae Och1p; required for wild-type virulence in mouse intravenous infection; fungal-specific (no human or murine homolog)
chr3	275-278	1370001	1390000	DED1	orf19.7392	1390000	1387982	Predicted ATP-dependent RNA helicase; RNA strand annealing activity; Spider biofilm induced
chr3	291-292	1450001	1460000	ALS7	orf19.7400	1446611	1451317	ALS family protein; hypermutable contingency gene; growth-regulated, downregulated in biofilm; two variable repeat regions; expression in S. cerevisiae does not confer adhesiveness; ALS family includes adhesins, cell-surface glycoproteins
chr3	291-292	1450001	1460000	TSA1B	orf19.7398.1	1452471	1453061	Putative peroxidase; orf19.7398.1 is contig-truncated fragment of gene identical to TSA1; Tsa1p and Tsa1Bp role under oxidative/reductive stress, hyphal cell wall formation; in hyphal nucleus, cell wall; yeast-form nucleus, cytoplasm
chr3	291-292	1450001	1460000	HNT2	orf19.7419	1453313	1453855	Putative dinucleoside triphosphate hydrolase; induced upon low-level peroxide stress
chr3	291-292	1450001	1460000		orf19.7420	1453974	1454765	Protein of unknown function
chr3	291-292	1450001	1460000	CYP5	orf19.7421	1455477	1455477	Putative peptidyl-prolyl cis-trans isomerase; macrophage-downregulated protein level; protein level decrease in stationary phase cultures; predicted endoplasmic reticulum (ER) localization
chr3	291-292	1450001	1460000		orf19.7422	1456909	1455737	Protein of unknown function
chr3	291-292	1450001	1460000	NSA2	orf19.7424	1457022	1457807	Putative protein constituent of 66S pre-ribosomal particles; Hap43-induced; repressed by prostaglandins
chr3	291-292	1450001	1460000		orf19.7398	1457310	1457807	Protein of unknown function' Hap43-induced gene; repressed by prostaglandins
chr3	291-292	1450001	1460000		orf19.7425	1459099	1458032	Protein of unknown function
chr3	291-292	1450001	1460000		orf19.7426	1460544	1459522	Protein of unknown function
chr4	136	675000	680000		orf19.2669	678707	674364	ORF in retrotransposon Tca4; similar to Pol region of retrotransposons encoding reverse transcriptase, protease, integrase; downstream of RHD2, similar to the Gag region encoding nucleocapsid-like protein; rat catheter biofilm induced
chr4	136	675000	680000		orf19.2668.1	680277	678838	Region in retrotransposon Tca4 annotated in Assembly 21 as a blocked reading frame, based on comparative genome analysis; overlaps orf19.2668, which is an open reading frame similar to Gag proteins of retrotransposons
chr4	136	675000	680000	RHD2	orf19.2668	680277	679360	Predicted ORF in retrotransposon Tca4 with similarity to the Gag region encoding nucleocapsid-like protein; overlaps blocked reading frame orf19.2668.1; yeast-enriched transcript; rat catheter biofilm induced
chr5	80	395001	400000	MTLA2	orf19.3200	395253	394593	Master regulator (activator) of a-type mating; has HMG domain, which is predicted to bind DNA; gene has intron; not related to S. cerevisiae MATa2; a/alpha mating type may increase virulence, provides competitive advantage
chr5	80	395001	400000	PIKA	orf19.3199	398238	395368	Putative phosphatidylinositol kinase; non-sex gene located within the MTLa mating-type-like locus
chr5	80	395001	400000	OBPA	orf19.3198	400104	398803	Similar to oxysterol binding protein; non-sex gene located within the MTLa mating-type-like locus; Plc1p-regulated
chr5	239	1190000	1195000
chrR	237	1180001	1185000		orf19.5848	1181206	1179341	RING-type zinc finger protein; upregulated during oral infection; mutants have reduced ability to damage oral epithelial cells; Spider and flow model biofilm induced
chrR	237	1180001	1185000		orf19.5847	1185262	1181789	Protein of unknown function
chrR	380-457	1895000	2285000	RDN25		1893621	1896981	25S ribosomal RNA; component of the large (60S) ribosomal subunit; encoded in about 55 copies of the rDNA repeat on Chromosome R; in some strains the gene may contain the self-splicing group I intron (LSU)
chrR	380-457	1895000	2285000		orf19.7279.1	1898635	1898898	Protein of unknown function; Spider biofilm induced
chrR	380-457	1895000	2285000	NIT2	orf19.7279	1900436	1899537	Putative carbon-nitrogen hydrolase; rat catheter biofilm repressed
chrR	380-457	1895000	2285000		orf19.7280	1900825	1901148	Protein of unknown function
chrR	380-457	1895000	2285000	PDK2	orf19.7281	1902531	1904066	Putative pyruvate dehydrogenase kinase; mutation confers hypersensitivity to amphotericin B
chrR	380-457	1895000	2285000	PEX13	orf19.7282	1904917	1906032	Protein required for peroxisomal protein import mediated by PTS1 and PTS2 targeting sequences; transcript induced in an RHE model of oral candidiasis; Hap43-repressed gene
chrR	380-457	1895000	2285000		orf19.7283	1906824	1906456	Protein of unknown function; rat catheter and Spider biofilm induced
chrR	380-457	1895000	2285000	ASR2	orf19.7284	1907965	1907189	Adenylyl cyclase and stress responsive protein; induced in cyr1 or ras1 mutant; stationary phase enriched protein; Spider biofilm induced
chrR	380-457	1895000	2285000		orf19.7285	1909464	1908367	Protein of unknown function
chrR	380-457	1895000	2285000	RPN7	orf19.7286	1911418	1910216	Subunit of the proteasome regulatory particle; regulated by Gcn2p and Gcn4p; protein present in exponential and stationary growth phase yeast cultures
chrR	380-457	1895000	2285000		orf19.7288	1911800	1913122	Protein with predicted oxidoreductase and dehydrogenase domains; Hap43-repressed; Spider biofilm induced
chrR	380-457	1895000	2285000		orf19.7290	1913738	1913235	Protein of unknown function
chrR	380-457	1895000	2285000		orf19.7291	1914361	1915368	Protein of unknown function
chrR	380-457	1895000	2285000	ARP2	orf19.7292	1915605	1916846	Component of the Arp2/3 complex; required for virulence, hyphal growth, cell wall/cytoskeleton organization, not for endocytosis; mutation confers hypersensitivity to cytochalasin D; regulated by Gcn2 and Gcn4; Spider biofilm repressed
chrR	380-457	1895000	2285000	MPS1	orf19.7293	1918974	1916902	Monopolar spindle protein, a putative kinase; essential for growth; periodic mRNA expression, peak at cell-cycle S/G2 phase
chrR	380-457	1895000	2285000	tM(CAU)4		1919711	1919784	tRNA-Met, predicted by tRNAscan-SE; CAU anticodon
chrR	380-457	1895000	2285000		orf19.7295	1921462	1919900	Protein of unknown function
chrR	380-457	1895000	2285000		orf19.7296	1923260	1922208	Putative cation conductance protein; similar to stomatin mechanoreception protein; plasma-membrane localized; induced by Rgt1; rat catheter and Spider biofilm induced
chrR	380-457	1895000	2285000	eta-Rb		1924226	1924696	Solo copy of the long terminal repeat (LTR) associated with the transposon Tca11; about 470 bp long, 13 copies per genome
chrR	380-457	1895000	2285000		orf19.7297	1926092	1924941	Putative cystathionine gamma-synthase; decreased levels in stationary phase cultures; Hog1p-induced; Gcn4p-regulated
chrR	380-457	1895000	2285000	CHS2	orf19.7298	1929888	1926859	Chitin synthase; nonessential; required for wild-type chitin deposition in hyphae; transcript regulated during dimorphic transition; Chs1 and Chs2, but not Chs3, are inhibited by the protoberberine HWY-289; flow model biofilm repressed
chrR	380-457	1895000	2285000		orf19.7299.1	1931347	1931048	Protein of unknown function
chrR	380-457	1895000	2285000		orf19.7300	1931876	1932700	Protein of unknown function; Spider biofilm induced
chrR	380-457	1895000	2285000		orf19.7301	1934844	1933084	Protein of unknown function
chrR	380-457	1895000	2285000		orf19.7303	1935993	1936730	Protein of unknown function
chrR	380-457	1895000	2285000		orf19.7304	1938292	1936814	Protein of unknown function; Hap43-induced; transcript induced early in infection of reconstituted human epithelium, while expression of the C. dubliniensis ortholog is not upregulated; mutants are viable; rat catheter biofilm repressed
chrR	380-457	1895000	2285000	upsilon-Ra		1939833	1939570	Long terminal repeat (LTR); about 264 bp long, 6 copies per genome
chrR	380-457	1895000	2285000		orf19.7305	1941773	1940490	Protein of unknown function
chrR	380-457	1895000	2285000		orf19.7306	1943395	1942346	Aldo-keto reductase; increased transcript associated with MDR1 overexpression, benomyl or long-term fluconazole treatment; overexpression does not affect drug or oxidative stress sensitivity; stationary phase enriched; flow biofim repressed
chrR	380-457	1895000	2285000		orf19.7307	1944876	1944019	Putative oxidoreductase; similar to S. cerevisiae Pga3p; possible Kex2p substrate
chrR	380-457	1895000	2285000	TUB1	orf19.7308	1947002	1945442	Alpha-tubulin; gene has intron; complements cold-sensitivity of S. cerevisiae tub1 mutant; C. albicans has single alpha-tubulin gene, whereas S. cerevisiae has two (TUB1, TUB3); farnesol-upregulated in biofilm; sumoylation target
chrR	380-457	1895000	2285000	pi-Ra		1947582	1947303	Long terminal repeat (LTR); about 280 bp long, 17 copies per genome
chrR	380-457	1895000	2285000		orf19.7310	1950017	1947651	Protein with a role in directing meiotic recombination events to homologous chromatids; induced by ciclopirox olamine; positively regulated by Sfu1; Hog1, fluconazole-repressed; Hap43-induced; Spider biofilm induced
chrR	380-457	1895000	2285000		orf19.7311	1950737	1951321	Protein of unknown function; Spider biofilm induced
chrR	380-457	1895000	2285000	ERG13	orf19.7312	1952785	1951430	3-hydroxy-3-methylglutaryl coenzyme A synthase; ergosterol biosynthesis; sumoylation target; Tn mutation affects filamentation; amphotericin B, caspofungin repressed; exponential, stationary growth phase expressed; Spider biofilm repressed
chrR	380-457	1895000	2285000	SSU1	orf19.7313	1955514	1954069	Protein similar to S. cerevisiae Ssu1 sulfite transport protein; Tn mutation affects filamentous growth; regulated by Gcn2 and Gcn4; induced by nitric oxide; Hap43-repressed; Spider and flow model biofilm induced
chrR	380-457	1895000	2285000	CDG1	orf19.7314	1957893	1958690	Putative cysteine dioxygenases; role in conversion of cysteine to sulfite; transcript regulated upon white-opaque switch; rat catheter, Spider and flow model biofilm induced
chrR	380-457	1895000	2285000		orf19.7316	1959725	1958820	Putative phytanoyl-CoA dioxygenase family protein; mutation confers hypersensitivity to 5-fluorocytosine (5-FC), 5-fluorouracil (5-FU), and tubercidin (7-deazaadenosine); induced by nitric oxide
chrR	380-457	1895000	2285000	UGA33		1961409	1959961	Zinc-finger transcription factor; similar to S. cerevisiae Uga3 which regulates gamma-aminobutyrate metabolism gene expression; required for yeast cell adherence to silicone substrate; rat catheter biofilm induced
chrR	380-457	1895000	2285000	SUC1		1961827	1963332	Zinc-finger transcription factor; regulates alpha-glucosidase exression; complements S. cerevisiae suc2 for sucrose utilization and mal13 maltase defect; required for yeast cell adherence to silicone substrate; rat catheter biofilm induced
chrR	380-457	1895000	2285000	LIP7		1964703	1963423	Probable lipase, part of a gene family whose members are differentially expressed during infection; lacks a signal sequence for secretion, unlike other family members; may have a role in nutrition or in creating an acidic microenvironment
chrR	380-457	1895000	2285000		orf19.7321	1966892	1965072	Protein of unknown function
chrR	380-457	1895000	2285000		orf19.7322	1967721	1967278	Protein of unknown function; S. cerevisae ortholog Ypl225w interacts with ribosomes; rat catheter biofilm induced
chrR	380-457	1895000	2285000	pi-Rb		1968075	1968322	Long terminal repeat (LTR); about 280 bp long, 17 copies per genome
chrR	380-457	1895000	2285000	psi-Rc		1968323	1968792	Solo copy of the long terminal repeat (LTR) associated with the transposon Tca9; about 470 bp long, 30 copies per genome
chrR	380-457	1895000	2285000	CBP1		1970339	1968870	Corticosteroid binding protein; transcription induced at late log-phase or upon adherence to polystyrene; not induced by corticosterone; contains a possible NAD/FAD binding region; regulated by Nrg1, Tup1; Spider biofilm induced
chrR	380-457	1895000	2285000	zeta-Rc		1971126	1971633	Long terminal repeat (LTR) associated with the transposon Tca7; about 508 bp long, 10-15 copies per genome
chrR	380-457	1895000	2285000	THI13		1972365	1973384	Thiamin pyrimidine synthase; synthesis of the thiamine precursor hydroxymethylpyrimidine phosphate; single-turnover enzyme that provides histidine for HMP-P formation; induced by nitric oxide independent of Yhb1; Spider biofilm induced
chrR	380-457	1895000	2285000	SCO1		1974446	1973541	Putative copper transporter; Hap43p-repressed gene
chrR	380-457	1895000	2285000		orf19.7326	1974889	1976628	Protein of unknown function
chrR	380-457	1895000	2285000	PHO88		1977431	1976856	Protein with a role in phosphate transport; biofilm-regulated expression; amphotericin B repressed
chrR	380-457	1895000	2285000		orf19.7328	1980530	1977825	Protein with a Staphylococcal nuclease domain; transcript regulated by Mig1 and Tup1; flow model and Spider biofilm repressed
chrR	380-457	1895000	2285000		orf19.7329	1981163	1981666	Protein of unknown function
chrR	380-457	1895000	2285000		orf19.7330	1982885	1982172	Protein with a predicted heme oxygenase domain; Spider biofilm induced
chrR	380-457	1895000	2285000	FCY24		1983245	1984831	Putative transporter; more similar to S. cerevisiae Tpn1, which is a vitamin B6 transporter, than to purine-cytosine permeases; transcription is regulated by Nrg1; Spider biofilm induced
chrR	380-457	1895000	2285000	ELF1		1985195	1988782	Putative mRNA export protein; Walker A and B (ATP/GTP binding) motifs; required for wild-type morphology, growth; expressed in hyphal, pseudohyphal, and yeast form; Hap43-induced; Spider and flow model biofilm induced
chrR	380-457	1895000	2285000	PRE8		1989161	1990063	Putative alpha-2_sc subunit of proteasome; macrophage-induced protein; regulated by Gcn2p and Gcn4p; transcription is positively regulated by Tbf1p; stationary phase enriched protein
chrR	380-457	1895000	2285000		orf19.7336	1992313	1990499	Predicted membrane transporter; member of the drug:proton antiporter (14 spanner) (DHA2) family, major facilitator superfamily (MFS); Spider biofilm induced
chrR	380-457	1895000	2285000	xi-Ra		1998846	1999232	Long terminal repeat (LTR); about 387 bp long, 5 copies per genome
chrR	380-457	1895000	2285000		orf19.7337	2000400	2002514	Protein with a nischarin related domain and leucine rich repeats; Spider biofilm induced
chrR	380-457	1895000	2285000	BGL22		2005913	2002983	Putative glucanase; induced during cell wall regeneration
chrR	380-457	1895000	2285000		orf19.7340	2006764	2006432	Protein of unknown function; possibly C. albicans specific; Spider biofilm induced
chrR	380-457	1895000	2285000		orf19.7341	2007958	2006911	Protein of unknown function; flow model biofilm induced; ketoconazole-repressed
chrR	380-457	1895000	2285000	tD(GUC)7		2009119	2009048	tRNA-Asp, predicted by tRNAscan-SE; GUC anticodon
chrR	380-457	1895000	2285000		orf19.7341.1	2015578	2015285	Protein of unknown function; Spider biofilm induced
chrR	380-457	1895000	2285000	AXL1		2017305	2021417	Putative endoprotease; induced by alpha factor; transcript is upregulated in an RHE model of oral candidiasis and in clinical isolates from HIV+ patients with oral candidiasis
chrR	380-457	1895000	2285000		orf19.7343	2021942	2023318	Protein of unknown function
chrR	380-457	1895000	2285000		orf19.7344	2023763	2026270	Protein of unknown function
chrR	380-457	1895000	2285000		orf19.7345	2027614	2026610	Protein of unknown function
chrR	380-457	1895000	2285000		orf19.6612	2028770	2027970	Putative mitochondrial protein; Hap43p-induced gene
chrR	380-457	1895000	2285000		orf19.6610	2031915	2029141	Protein of unknown function
chrR	380-457	1895000	2285000		orf19.6608	2034660	2032492	Predicted DDE superfamily endonuclease domain; repression correlates with clinical development of fluconazole resistance; Spider biofilm induced
chrR	380-457	1895000	2285000	tara-Ra		2035222	2035506	Long terminal repeat (LTR); about 285 bp long, 9 copies per genome
chrR	380-457	1895000	2285000		orf19.6607	2036446	2035832	Protein of unknown function
chrR	380-457	1895000	2285000		orf19.6606	2038879	2037515	Protein of unknown function
chrR	380-457	1895000	2285000		orf19.6605	2039230	2040093	Protein of unknown function
chrR	380-457	1895000	2285000		orf19.6604	2041588	2040213	Ortholog of S. cerevisiae Pba1 that is involved in 20S proteasome assembly; upregulated in a cyr1 null mutant; contains a 5' UTR intron
chrR	380-457	1895000	2285000		orf19.6602	2042808	2043677	Protein of unknown function
chrR	380-457	1895000	2285000	YKE2		2044321	2043818	Possible heterohexameric Gim/prefoldin protein complex subunit; role in folding alpha-tubulin, beta-tubulin, and actin; transcript induced by yeast-to-hypha switch; regulated by Nrg1, Tup1; Spider and flow model biofilm induced
chrR	380-457	1895000	2285000		orf19.6601	2046291	2045083	Protein of unknown function; rat catheter and flow model biofilm induced
chrR	380-457	1895000	2285000		orf19.6600	2048280	2047690	Protein of unknown function
chrR	380-457	1895000	2285000	tN(GUU)4		2049231	2049324	tRNA-Asn, predicted by tRNAscan-SE; GUU anticodon
chrR	380-457	1895000	2285000		orf19.6599.1	2049950	2049756	Protein of unknown function
chrR	380-457	1895000	2285000	WAL1		2050368	2052509	Protein required for hyphal growth and for wild-type cell morphology, polarized budding, endocytosis, vacuole morphology; similar to Wiskott-Aldrich syndrome protein; localizes to cortical actin patches and hyphal tips
chrR	380-457	1895000	2285000		orf19.6597	2053092	2054267	Protein of unknown function
chrR	380-457	1895000	2285000		orf19.6596	2055203	2054292	Putative esterase; possibly transcriptionally regulated by Tac1; induced by Mnl1 under weak acid stress; protein present in exponential and stationary growth phase yeast cultures; Spider biofilm repressed
chrR	380-457	1895000	2285000	RTA4		2057241	2055871	Protein similar to S. cerevisiae Rsb1p, involved in fatty acid transport; transposon mutation affects filamentous growth; alkaline downregulated; caspofungin induced; possibly an essential gene; Hap43p-repressed
chrR	380-457	1895000	2285000	PLB3		2061195	2059297	GPI-anchored cell surface phospholipase B; possibly secreted; fungal-specific (no mammalian homolog); induced by Tbf1; fluconazole-induced; possible essential gene (UAU1 method); Spider and flow model biofilm induced
chrR	380-457	1895000	2285000		orf19.6592	2063769	2065538	Predicted membrane transporter, member of the aromatic acid:proton symporter (AAHS) family, major facilitator superfamily (MFS)
chrR	380-457	1895000	2285000	PCD1		2066600	2067778	Protein of unknown function
chrR	380-457	1895000	2285000	VMA22		2068017	2068583	Protein of unknown function
chrR	380-457	1895000	2285000	SSF1		2069970	2068624	Protein involved in ribosome biogenesis; ortholog of S. cerevisiae Ssf1; Hap43-induced; rat catheter and Spider biofilm induced
chrR	380-457	1895000	2285000		orf19.7546	2070097	2071701	Protein involved in rRNA processing; required for maturation of the 35S primary transcript of pre-rRNA and for cleavage leading to mature 18S rRNA; Spider biofilm induced
chrR	380-457	1895000	2285000		orf19.7547	2072857	2071769	Protein of unknown function
chrR	380-457	1895000	2285000	MED21		2073450	2073986	Protein of unknown function
chrR	380-457	1895000	2285000	PMT5		2076212	2074035	Protein mannosyltransferase (PMT), expressed at extremely low levels; not required for wild-type hyphal growth, drug resistance, or virulence in mouse systemic infection; one of five PMT family members
chrR	380-457	1895000	2285000	IFA14		2080150	2078114	Putative LPF family protein; Plc1-regulated; induced by alpha pheromone in SpiderM medium
chrR	380-457	1895000	2285000	ALO1		2090795	2092468	D-Arabinono-1,4-lactone oxidase involved in biosynthesis of dehydro-D-arabinono-1,4-lactone, which has a protective role against oxidative damage; plasma membrane-localized;required for full virulence in a mouse model of systemic infection
chrR	380-457	1895000	2285000		orf19.7552	2095287	2092669	Putative U3-containing small subunit processome complex protein; Hap43-induced gene; repressed in core stress response; Spider biofilm induced
chrR	380-457	1895000	2285000		orf19.7553	2095906	2096619	Protein of unknown function; rat catheter biofilm repressed
chrR	380-457	1895000	2285000		orf19.7554	2097128	2098810	Transporter; similar to the Sit1 siderophore transporter; induced by nitric oxide independent of Yhb1; repressed during chlamydospore formation in C. albicans and C. dubliniensis; rat catheter biofilm repressed
chrR	380-457	1895000	2285000		orf19.7555	2097154	2096717	Protein of unknown function
chrR	380-457	1895000	2285000		orf19.7556	2099576	2098932	Protein of unknown function
chrR	380-457	1895000	2285000	FGR46		2100712	2100350	Protein lacking an ortholog in S. cerevisiae; transposon mutation affects filamentous growth
chrR	380-457	1895000	2285000	YTA6		2100853	2103315	Protein similar to S. cerevisiae Yta6p ATPase but ortholog of S. cervisiae Sap1; transposon mutation affects filamentous growth; induced by Mnl1 under weak acid stress
chrR	380-457	1895000	2285000	kahu-Rb		2103918	2103388	Long terminal repeat (LTR) associated with the transposon Tca15; about 531 bp long, 17 copies per genome
chrR	380-457	1895000	2285000	DEF1		2106215	2108878	RNA polymerase II regulator; role in filamentation, epithelial cell escape, dissemination in RHE model; induced by fluconazole, high cell density; Efg1/hyphal regulated; role in adhesion, hyphal growth on solid media; Spider biofilm induced
chrR	380-457	1895000	2285000	BET2		2114062	2113037	Putative Type II geranylgeranyltransferase beta subunit; transcript regulated by Mig1
chrR	380-457	1895000	2285000	DPB2		2116462	2114336	Probable subunit of DNA polymerase II (DNA polymerase epsilon), similar to S. cerevisiae Dpb2p; essential for viability; rat catheter biofilm induced
chrR	380-457	1895000	2285000	GNP3		2118782	2120479	Putative high-affinity glutamine permease; fungal-specific (no human or murine homolog)
chrR	380-457	1895000	2285000		orf19.7566	2122928	2124643	Predicted amino acid transport domain; transcript upregulated in clinical strains from HIV+ patients with oral candidiasis; alkaline upregulated by Rim101; rat catheter, Spider and flow model biofilm induced
chrR	380-457	1895000	2285000		orf19.7567	2125477	2126766	Protein of unknown function; induced by alpha pheromone in SpiderM medium
chrR	380-457	1895000	2285000		orf19.7568	2127071	2127916	Protein of unknown function
chrR	380-457	1895000	2285000	SIK1		2129688	2128138	Putative U3 snoRNP protein; Hap43p-induced gene; physically interacts with TAP-tagged Nop1p
chrR	380-457	1895000	2285000	UGA3		2132371	2129960	Zn(II)2Cys6 transcription factor; required for utilization of gamma-aminobutyrate (GABA) as a nitrogen source; mutants display decreased CFU in mouse kidneys; Spider biofilm induced
chrR	380-457	1895000	2285000	UBC4		2133698	2134585	Protein of unknown function
chrR	380-457	1895000	2285000	SPT7		2135360	2139283	Putative SAGA transcriptional regulatory complex subunit; mutation confers hypersensitivity to toxic ergosterol analog, and to amphotericin B
chrR	380-457	1895000	2285000		orf19.7574	2139917	2144236	Protein of unknown function
chrR	380-457	1895000	2285000		orf19.7576	2144797	2144339	Ortholog of S. pombe atl1 alkyltransferase-like protein; mutants are viable; Spider biofilm induced
chrR	380-457	1895000	2285000	MSS51		2146359	2145052	Putative mRNA maturation factor; fungal-specific (no human or murine homolog)
chrR	380-457	1895000	2285000		orf19.7578	2147575	2146799	Protein of unknown function
chrR	380-457	1895000	2285000	FGR34		2148076	2149641	Protein lacking an ortholog in S. cerevisiae; transposon mutation affects filamentous growth
chrR	380-457	1895000	2285000		orf19.7580	2149931	2150245	Protein of unknown function
chrR	380-457	1895000	2285000	gamma-Ra		2150623	2150343	Solo copy of the long terminal repeat (LTR) associated with the transposon Tca2; about 280 bp long, 5-10 copies per genome
chrR	380-457	1895000	2285000		orf19.7581	2150750	2152165	Protein with a predicted role in assembly of U2 snRNP into the spliceosome; Spider biofilm induced
chrR	380-457	1895000	2285000	ZCF39		2154225	2152180	Zn(II)2Cys6 transcription factor; mutants are viable; filament induced; required for yeast cell adherence to silicone substrate; Spider biofilm induced
chrR	380-457	1895000	2285000	tui-Ra		2154454	2154256	Long terminal repeat (LTR); about 199 bp long, 19 copies per genome
chrR	380-457	1895000	2285000	theta-Ra		2154910	2154579	Long terminal repeat (LTR); about 366 bp long, 7 copies per genome
chrR	380-457	1895000	2285000	INO1		2157196	2155634	Inositol-1-phosphate synthase; antigenic in human; repressed by farnesol in biofilm or by caspofungin; upstream inositol/choline regulatory element; glycosylation predicted; rat catheter, flow model induced; Spider biofilm repressed
chrR	380-457	1895000	2285000	CHT3		2161835	2163538	Major chitinase; secreted; functional homolog of S. cerevisiae Cts1p; 4 N-glycosylation motifs; possible O-mannosylation; putative signal peptide; hyphal-repressed; farnesol upregulated in biofilm; regulated by Efg1p, Cyr1p, Ras1p
chrR	380-457	1895000	2285000		orf19.7588	2164594	2163773	Protein of unknown function
chrR	380-457	1895000	2285000		orf19.7589	2164701	2165435	Protein of unknown function; Hap43-repressed gene; transcript induced by elevated CO2
chrR	380-457	1895000	2285000		orf19.7590	2165996	2168158	Putative NADH-ubiquinone oxidoreductase; identified in detergent-resistant membrane fraction (possible lipid raft component); predicted N-terminal acetylation; repressed by nitric oxide
chrR	380-457	1895000	2285000	titi-Ra		2169610	2169275	Long terminal repeat (LTR); about 336 bp long, 3 copies per genome
chrR	380-457	1895000	2285000	FAA4		2172618	2174708	Predicted acyl CoA synthase
chrR	380-457	1895000	2285000		orf19.7593	2176379	2174925	Putative asparaginase; predicted role in asparagine catabolism; Spider biofilm induced
chrR	380-457	1895000	2285000		orf19.7594	2176858	2177499	Protein of unknown function; Spider biofilm induced
chrR	380-457	1895000	2285000		orf19.7595	2178885	2177557	Protein of unknown function
chrR	380-457	1895000	2285000		orf19.7596	2179540	2180523	Protein with a phosphoglycerate mutase family domain; Hap43-repressed gene
chrR	380-457	1895000	2285000	PGA12		2181057	2182004	Putative GPI-anchored protein
chrR	380-457	1895000	2285000	eta-Ra		2182782	2182313	Solo copy of the long terminal repeat (LTR) associated with the transposon Tca11; about 470 bp long, 13 copies per genome
chrR	380-457	1895000	2285000		orf19.7598	2182918	2184237	Protein of unknown function
chrR	380-457	1895000	2285000	UTP5		2184474	2186384	Putative U3 snoRNA-associated protein; Hap43p-induced gene; mutation confers resistance to 5-fluorocytosine (5-FC), 5-fluorouracil (5-FU), and tubercidin (7-deazaadenosine); physically interacts with TAP-tagged Nop1p
chrR	380-457	1895000	2285000	FDH3		2187850	2186501	Glutathione-dependent formaldehyde dehydrogenase; glycine catabolism; repressed by Efg1 in yeast, not hyphal growth conditions; induced by Mnl1 under weak acid stress; Spider biofilm repressed
chrR	380-457	1895000	2285000		orf19.7601	2188567	2189382	Putative mitochondrial 2' O-ribose methyltransferase; predicted role in methylation of U(2791) in 21S rRNA; Spider biofilm induced
chrR	380-457	1895000	2285000	AHA1		2190483	2189443	Putative Hsp90p co-chaperone; Hap43-repressed; heavy metal (cadmium) stress-induced; oxidative stress-induced via Cap1; rat catheter biofilm induced; flow model biofilm repressed
chrR	380-457	1895000	2285000		orf19.7603	2191147	2191473	Protein with a predicted role in cytochrome c oxidase assembly; rat catheter biofilm induced
chrR	380-457	1895000	2285000		orf19.7604	2195374	2191550	Protein of unknown function
chrR	380-457	1895000	2285000	PUP1		2195778	2196596	Putative beta 2 subunit of the 20S proteasome; macrophage/pseudohyphal-repressed; Spider biofilm repressed
chrR	380-457	1895000	2285000		orf19.7606	2197624	2198115	Protein of unknown function
chrR	380-457	1895000	2285000		orf19.7608	2199676	2200071	Protein of unknown function; fluconazole-repressed; Spider biofilm induced
chrR	380-457	1895000	2285000	PGA11		2201728	2202102	Putative GPI-anchored protein
chrR	380-457	1895000	2285000	PTP3		2206947	2209715	Putative protein tyrosine phosphatase; hypha induced; alkaline induced; regulated by Efg1, Ras1, cAMP pathways; mutants are viable; Spider biofilm induced; rat catheter biofilm repressed; flow model biofilm repressed
chrR	380-457	1895000	2285000	TRX1		2210638	2210327	Thioredoxin; involved in response to reactive oxygen species; biofilm, benomyl, flucytosine, peroxide, Hap43 induced; amphotericin B, caspofungin repressed; induced by human neutrophils; macrophage-repressed gene
chrR	380-457	1895000	2285000	CTM1		2213688	2211628	Putative cytochrome c lysine methyltransferase; regulated by Gcn2 and Gcn4; transcript induced by Mnl1 under weak acid stress; early-stage flow model biofilm induced
chrR	380-457	1895000	2285000	HCR1		2214260	2215117	Putative translation initiation factor; repressed upon phagocytosis by murine macrophage; Spider biofilm repressed
chrR	380-457	1895000	2285000		orf19.7614	2216261	2215236	Protein of unknown function; Hap43-induced gene; mutant is viable
chrR	380-457	1895000	2285000		orf19.7615	2216559	2217305	Protein involved in endoplasmic reticulum (ER) to Golgi vesicle-mediated transport; putative subunit of the transport protein particle (TRAPP) complex of the cis-Golgi; Spider biofilm induced
chrR	380-457	1895000	2285000		orf19.7617	2217467	2218099	Protein of unknown function
chrR	380-457	1895000	2285000		orf19.7618	2218969	2218139	Putative nucleolar protein with a predicted role in pre-18S rRNA processing; Plc1p-regulated; Spider biofilm induced
chrR	380-457	1895000	2285000		orf19.7619	2219901	2221751	Protein with a mitochondrial distribution and morphology domain; possibly an essential gene, disruptants not obtained by UAU1 method; rat catheter and Spider biofilm induced
chrR	380-457	1895000	2285000		orf19.7620	2222451	2221873	Protein of unknown function
chrR	380-457	1895000	2285000		orf19.7621	2223004	2225697	Putative subunit of an alternative replication factor C complex; role in DNA replication, genome integrity, homologous recombination-mediated repair and telomere homeostasis;
chrR	380-457	1895000	2285000	SPT3		2226700	2225714	Functional homolog of S. cerevisiae Spt3p; required for virulence in mouse systemic infection; homozygous null mutant is hyperfilamentous
chrR	380-457	1895000	2285000	snR13		2227004	2227088	C/D box small nucleolar RNA (snoRNA)
chrR	380-457	1895000	2285000		orf19.7624	2229053	2227458	Protein of unknown function
chrR	380-457	1895000	2285000	PGA1		2229458	2229856	Putative GPI-anchored protein; induced during cell wall regeneration; required for normal adhesion to host cells and for adherence during Sabouraud biofilm formation; Spider biofilm induced
chrR	380-457	1895000	2285000	EIF4E		2230355	2230984	Translation initiation factor eIF4E; genes encoding ribosomal subunits, translation factors, tRNA synthetases downregulated by phagocytosis by macrophage; alternatively spliced intron in 5' UTR; protein levels decrease in stationary phase
chrR	380-457	1895000	2285000		orf19.7627	2231921	2231031	Protein of unknown function
chrR	380-457	1895000	2285000		orf19.7629	2232120	2235386	Protein of unknown function
chrR	380-457	1895000	2285000	SLD5		2236105	2235395	Putative GINS complex subunit; cell-cycle regulated periodic mRNA expression
chrR	380-457	1895000	2285000		orf19.7632	2236271	2237758	Protein of unknown function
chrR	380-457	1895000	2285000	MCD1		2239475	2237781	Alpha-kleisin cohesin complex subunit; for sister chromatid cohesion in mitosis and meiosis; repressed by alpha pheromone in SpiderM medium; periodic cell-cycle expression; Hap43-repressed; rat catheter and Spider biofilm repressed
chrR	380-457	1895000	2285000	DRS1		2240886	2242727	Putative nucleolar DEAD-box protein; Hap43-induced; mutation confers hypersensitivity to 5-fluorouracil (5-FU), tubercidin (7-deazaadenosine); Tbf1-induced; repressed in core stress response
chrR	380-457	1895000	2285000	alpha-Ra		2244072	2243684	Long terminal repeat (LTR) associated with the transposon Tca1; about 388 bp long, 5-10 copies per genome
chrR	380-457	1895000	2285000	YHB4		2245358	2244156	Protein related to flavohemoglobins; not required for wild-type nitric oxide resistance; has predicted globin, FAD-binding, and NAD(P)-binding domains but lacks some conserved residues of flavohemoglobins; Hap43p-repressed gene
chrR	380-457	1895000	2285000	PRO1		2245865	2247136	Putative gamma-glutamyl kinase; transcript regulated by Nrg1; regulated by Gcn2 and Gcn4; Hap43-repressed gene; early-stage flow model biofilm induced gene
chrR	380-457	1895000	2285000		orf19.7642	2247207	2249612	Ortholog of S. cerevisiae Vps3; CORVET tethering complex component involved in vacuolar protein sorting; Hap43-repressed gene
chrR	380-457	1895000	2285000		orf19.7643	2250641	2249595	Protein of unknown function
chrR	380-457	1895000	2285000		orf19.7644	2251108	2250707	Protein of unknown function
chrR	380-457	1895000	2285000		orf19.7645	2253169	2251172	Biotin protein ligase; catalyzes covalent attachment of biotin to biotin-dependent enzymes including acetyl CoA carboxylase and pyruvate carboxylase
chrR	380-457	1895000	2285000		orf19.7646	2253226	2254167	Protein of unknown function
chrR	380-457	1895000	2285000		orf19.7648	2254323	2255753	Protein of unknown function
chrR	380-457	1895000	2285000	LTV1		2255840	2256991	Putative GSE complex component; repressed by prostaglandins
chrR	380-457	1895000	2285000	CKA1		2257300	2258307	Putative alpha subunit (catalytic subunit) of protein kinase CK2; Cka1p and Cka2p have a common target with respect to fluconazole resistance; synthetically lethal with CKA2; flucytosine induced
chrR	380-457	1895000	2285000	CPR6		2258818	2259927	Putative peptidyl-prolyl cis-trans isomerase; macrophage/pseudohyphal-repressed; heavy metal (cadmium) stress-induced; heterozygous null mutant displays sensitivity to virgineone; rat catheter biofilm induced
chrR	380-457	1895000	2285000	RPO21		2260510	2265696	RNA polymerase II; ortholog of S. cerevisiae Rpo21, transposon mutation affects filamentous growth; flow model biofilm repressed
chrR	380-457	1895000	2285000	POP3		2265749	2266495	Putative RNase MRP and nuclear RNase P component; decreased repressed by prostaglandins; Spider biofilm induced
chrR	380-457	1895000	2285000	RFC4		2266570	2267541	Putative heteropentameric replication factor C subunit; flucytosine induced; periodic mRNA expression, peak at cell-cycle G1/S phase
chrR	380-457	1895000	2285000	VPS52		2269109	2267538	Protein required for hyphal growth; has similarity to S. cerevisiae Vps52p
chrR	380-457	1895000	2285000	HMI1		2269233	2271146	ATP-dependent 3' - 5' helicase involved in maintenance of mitochondrial DNA; ortholog of S. cerevisiae Hmi1; rat catheter biofilm repressed
chrR	380-457	1895000	2285000		orf19.7662	2272137	2271130	Protein of unknown function
chrR	380-457	1895000	2285000		orf19.7663	2272249	2272926	Protein of unknown function
chrR	380-457	1895000	2285000		orf19.7664	2273334	2272930	Protein of unknown function
chrR	380-457	1895000	2285000		orf19.7665	2273812	2273426	Protein of unknown function
chrR	380-457	1895000	2285000		orf19.7666	2274335	2275906	Predicted membrane transporter, member of the anion:cation symporter (ACS) family, major facilitator superfamily (MFS)
chrR	380-457	1895000	2285000	IAH1		2276724	2275918	Protein similar to S. cerevisiae Iah1p, which is involved in acetate metabolism; mutation confers hypersensitivity to tunicamycin; transposon mutation affects filamentous growth
chrR	380-457	1895000	2285000	MAL2		2276897	2278609	Alpha-glucosidase; hydrolyzes sucrose for sucrose utilization; transcript regulated by Suc1, induced by maltose, repressed by glucose; Tn mutation affects filamentous growth; upregulated in RHE model; rat catheter and Spider biofilm induced
chrR	380-457	1895000	2285000		orf19.7670	2281388	2278617	Putative Ca2+/H+ antiporter; oral infection upregulated gene; mutants have reduced capacity to damage oral epithelial cells
chrR	380-457	1895000	2285000		orf19.7672	2282476	2281481	Protein of unknown function
chrR	380-457	1895000	2285000		orf19.7673	2282567	2282917	Protein of unknown function
chrR	380-457	1895000	2285000		orf19.7675	2283424	2282948	Mitochondrial ribosomal protein of the large subunit; Spider biofilm repressed
chrR	380-457	1895000	2285000	XYL2		2284606	2283524	D-xylulose reductase; immunogenic in mice; soluble protein in hyphae; induced by caspofungin, fluconazole, Hog1 and during cell wall regeneration; Mnl1-induced in weak acid stress; stationary phase enriched; flow model biofilm induced
chrR	380-457	1895000	2285000	ATP16		2285380	2284895	Subunit of the mitochondrial F1F0 ATP synthase; sumoylation target; protein newly produced during adaptation to the serum; Spider biofilm repressed
