# Supplementary material
Source: Research Square preprint supplement (doi:10.21203/rs.3.rs-8970909/v1)
Supplement: Supplementary file 2 [file 5c83517ae1a6e1ce1ab16614.xlsx]

## Sheet: Sheet4
Individual ID	Number of isolates	Source of isolates	Sampling strategy	Type of study	Country	Continent	General context	Clade		Aneuploidy	Reference
IP21	2	Blood/Plueral fluid	Serial	Within host evolution of clinical isolates	Canada	North America	Disease	4			McTaggart et al, 2020
IP20	23	rectal and vaginal	Single	Diversity of isolates from individuals with RVVC	Canada	North America	Disease	1			Adamu et al., 2025
IP19	23	rectal and vaginal	Single	Diversity of isolates from individuals with RVVC	Canada	North America	Disease	1			Adamu et al., 2025
IP18	23	rectal and vaginal	Single	Diversity of isolates from individuals with RVVC	Canada	North America	Disease	1			Adamu et al., 2025
IP84	2	oral	Mother-child	Mother to child transmission of oral isolates	United States	North America	Commensal	1			Alkhars et al 2024
IP82	3	oral	Mother-child	Mother to child transmission of oral isolates	United States	North America	Commensal	1			Alkhars et al 2024
IP79	3	oral	Mother-child	Mother to child transmission of oral isolates	United States	North America	Commensal	1			Alkhars et al 2024
IP77	6	oral	Mother-child	Mother to child transmission of oral isolates	United States	North America	Commensal	1			Alkhars et al 2024
IP74	5	oral	Mother-child	Mother to child transmission of oral isolates	United States	North America	Commensal	1			Alkhars et al 2024
IP73	2	oral	Mother-child	Mother to child transmission of oral isolates	United States	North America	Commensal	1			Alkhars et al 2024
IP72	2	oral	Mother-child	Mother to child transmission of oral isolates	United States	North America	Commensal	1			Alkhars et al 2024
IP69	4	oral	Mother-child	Mother to child transmission of oral isolates	United States	North America	Commensal	1			Alkhars et al 2024
IP67	2	oral	Mother-child	Mother to child transmission of oral isolates	United States	North America	Commensal	1			Alkhars et al 2024
IP66	2	oral	Mother-child	Mother to child transmission of oral isolates	United States	North America	Commensal	1			Alkhars et al 2024
IP65	2	oral	Mother-child	Mother to child transmission of oral isolates	United States	North America	Commensal	1			Alkhars et al 2024
IP64	2	oral	Mother-child	Mother to child transmission of oral isolates	United States	North America	Commensal	1			Alkhars et al 2024
IP61	2	oral	Mother-child	Mother to child transmission of oral isolates	United States	North America	Commensal	1			Alkhars et al 2024
IP58	3	oral	Mother-child	Mother to child transmission of oral isolates	United States	North America	Commensal	1			Alkhars et al 2024
IP57	2	oral	Mother-child	Mother to child transmission of oral isolates	United States	North America	Commensal	1			Alkhars et al 2024
IP56	6	oral	Mother-child	Mother to child transmission of oral isolates	United States	North America	Commensal	1			Alkhars et al 2024
IP55	4	oral	Mother-child	Mother to child transmission of oral isolates	United States	North America	Commensal	1			Alkhars et al 2024
IP54	6	oral	Mother-child	Mother to child transmission of oral isolates	United States	North America	Commensal	1			Alkhars et al 2024
IP53	2	oral	Mother-child	Mother to child transmission of oral isolates	United States	North America	Commensal	1			Alkhars et al 2024
IP51	3	oral	Mother-child	Mother to child transmission of oral isolates	United States	North America	Commensal	1			Alkhars et al 2024
IP50	2	oral	Mother-child	Mother to child transmission of oral isolates	United States	North America	Commensal	1			Alkhars et al 2024
IP48	2	oral	Mother-child	Mother to child transmission of oral isolates	United States	North America	Commensal	1			Alkhars et al 2024
IP47	2	oral	Mother-child	Mother to child transmission of oral isolates	United States	North America	Commensal	1			Alkhars et al 2024
IP44	2	oral	Mother-child	Mother to child transmission of oral isolates	United States	North America	Commensal	1			Alkhars et al 2024
IP41	5	oral	Mother-child	Mother to child transmission of oral isolates	United States	North America	Commensal	1			Alkhars et al 2024
IP38	5	oral	Mother-child	Mother to child transmission of oral isolates	United States	North America	Commensal	1			Alkhars et al 2024
IP37	2	oral	Mother-child	Mother to child transmission of oral isolates	United States	North America	Commensal	1			Alkhars et al 2024
IP36	2	oral	Mother-child	Mother to child transmission of oral isolates	United States	North America	Commensal	1			Alkhars et al 2024
IP33	3	oral	Mother-child	Mother to child transmission of oral isolates	United States	North America	Commensal	1			Alkhars et al 2024
IP89	3	oral	Mother-child	Mother to child transmission of oral isolates	United States	North America	Commensal	2			Alkhars et al 2024
IP86	5	oral	Mother-child	Mother to child transmission of oral isolates	United States	North America	Commensal	2			Alkhars et al 2024
IP81	3	oral	Mother-child	Mother to child transmission of oral isolates	United States	North America	Commensal	2			Alkhars et al 2024
IP78	2	oral	Mother-child	Mother to child transmission of oral isolates	United States	North America	Commensal	2			Alkhars et al 2024
IP68	2	oral	Mother-child	Mother to child transmission of oral isolates	United States	North America	Commensal	2			Alkhars et al 2024
IP45	3	oral	Mother-child	Mother to child transmission of oral isolates	United States	North America	Commensal	2			Alkhars et al 2024
IP75	5	oral	Mother-child	Mother to child transmission of oral isolates	United States	North America	Commensal	3			Alkhars et al 2024
IP63	6	oral	Mother-child	Mother to child transmission of oral isolates	United States	North America	Commensal	3			Alkhars et al 2024
IP60	3	oral	Mother-child	Mother to child transmission of oral isolates	United States	North America	Commensal	3			Alkhars et al 2024
IP35	2	oral	Mother-child	Mother to child transmission of oral isolates	United States	North America	Commensal	3			Alkhars et al 2024
IP90	2	oral	Mother-child	Mother to child transmission of oral isolates	United States	North America	Commensal	4			Alkhars et al 2024
IP62	3	oral	Mother-child	Mother to child transmission of oral isolates	United States	North America	Commensal	4			Alkhars et al 2024
IP46	3	oral	Mother-child	Mother to child transmission of oral isolates	United States	North America	Commensal	4			Alkhars et al 2024
IP39	4	oral	Mother-child	Mother to child transmission of oral isolates	United States	North America	Commensal	4			Alkhars et al 2024
IP87	2	oral	Mother-child	Mother to child transmission of oral isolates	United States	North America	Commensal	8			Alkhars et al 2024
IP85	3	oral	Mother-child	Mother to child transmission of oral isolates	United States	North America	Commensal	8			Alkhars et al 2024
IP40	3	oral	Mother-child	Mother to child transmission of oral isolates	United States	North America	Commensal	8			Alkhars et al 2024
IP88	2	oral	Mother-child	Mother to child transmission of oral isolates	United States	North America	Commensal	9			Alkhars et al 2024
IP70	2	oral	Mother-child	Mother to child transmission of oral isolates	United States	North America	Commensal	11			Alkhars et al 2024
IP83	2	oral	Mother-child	Mother to child transmission of oral isolates	United States	North America	Commensal	12			Alkhars et al 2024
IP42	5	oral	Mother-child	Mother to child transmission of oral isolates	United States	North America	Commensal	1,2			Alkhars et al 2024
IP91	5	oral	Mother-child	Mother to child transmission of oral isolates	United States	North America	Commensal	1,3			Alkhars et al 2024
IP49	2	oral	Mother-child	Mother to child transmission of oral isolates	United States	North America	Commensal	1,3			Alkhars et al 2024
IP34	3	oral	Mother-child	Mother to child transmission of oral isolates	United States	North America	Commensal	1,3			Alkhars et al 2024
IP76	6	oral	Mother-child	Mother to child transmission of oral isolates	United States	North America	Commensal	1,4			Alkhars et al 2024
IP43	4	oral	Mother-child	Mother to child transmission of oral isolates	United States	North America	Commensal	1,4			Alkhars et al 2024
IP59	4	oral	Mother-child	Mother to child transmission of oral isolates	United States	North America	Commensal	1,8			Alkhars et al 2024
IP52	2	oral	Mother-child	Mother to child transmission of oral isolates	United States	North America	Commensal	2,3			Alkhars et al 2024
IP80	2	oral	Mother-child	Mother to child transmission of oral isolates	United States	North America	Commensal	2,4			Alkhars et al 2024
IP71	2	oral	Mother-child	Mother to child transmission of oral isolates	United States	North America	Commensal	2,8			Alkhars et al 2024
IP26	2	Oral	Single	Analyses of commensal isolates from healthy individuals	United States	North America	Commensal	1			Anderson et al., 2023
IP25	3	Oral/fecal	Single	Analyses of commensal isolates from healthy individuals	United States	North America	Commensal	1			Anderson et al., 2023
IP23	5	Oral/fecal	Single	Analyses of commensal isolates from healthy individuals	United States	North America	Commensal	1			Anderson et al., 2023
IP24	2	Oral	Single	Analyses of commensal isolates from healthy individuals	United States	North America	Commensal	8			Anderson et al., 2023
IP27	2	Oral	Single	Analyses of commensal isolates from healthy individuals	United States	North America	Commensal	12			Anderson et al., 2023
IP28	3	Oral/fecal	Single	Analyses of commensal isolates from healthy individuals	United States	North America	Commensal	1,15			Anderson et al., 2023
IP22	3	Oral/fecal	Single	Analyses of commensal isolates from healthy individuals	United States	North America	Commensal	1,4,15			Anderson et al., 2023
IP9	3	oropharynx	Serial	Evolution of resistance in sequenctial clinical isolates in HIV patients	United States	North America	Disease	1			Ford et al. 2015
IP7	2	oropharynx	Serial	Evolution of resistance in sequenctial clinical isolates in HIV patients	United States	North America	Disease	1		A sample has chr4,chr5 A sample has chr5	Ford et al. 2015
IP1	16	oropharynx	Serial	Evolution of resistance in sequenctial clinical isolates in HIV patients	United States	North America	Disease	1		A sample has chr3 A sample has chr6 A samples has CNV on chrR A sample has chr4,chr6,chr7	Ford et al. 2015
IP4	2	oropharynx	Serial	Evolution of resistance in sequenctial clinical isolates in HIV patients	United States	North America	Disease	3		A sample has chr5L	Ford et al. 2015
IP6	2	oropharynx	Serial	Evolution of resistance in sequenctial clinical isolates in HIV patients	United States	North America	Disease	15		Both have chr5	Ford et al. 2015
IP8	2	oropharynx	Single	Evolution of resistance in sequenctial clinical isolates in HIV patients	United States	North America	Disease	15			Ford et al. 2015
IP3	3	oropharynx	Serial	Evolution of resistance in sequenctial clinical isolates in HIV patients	United States	North America	Disease	15		A sample has chr4	Ford et al. 2015
IP5	4	oropharynx	Serial	Evolution of resistance in sequenctial clinical isolates in HIV patients	United States	North America	Disease	1,2		A sample has chr5R A sample has chr5 A sample has CNV on chr5L A sample has chr5L	Ford et al. 2015
IP2	2	oropharynx	Serial	Evolution of resistance in sequenctial clinical isolates in HIV patients	United States	North America	Disease	1,3			Ford et al. 2015
IP29	16	lung	Single	Candida albicans adaptive growth in the cystic fibrosis lung environment	Africa	Africa	Disease	10			Gnaien et al. 2024
IP94	2	Blood	Single	Candedimia outbeak in neonates	Spain	Europe	Disease	4			Guinea et al. 2022
IP93	2	Blood	Single	Candedimia outbeak in neonates	Spain	Europe	Disease	8			Guinea et al. 2022
IP92	2	Blood	Single	Candedimia outbeak in neonates	Spain	Europe	Disease	8			Guinea et al. 2022
IP95	3	Blood	Single	Candedimia outbeak in neonates	Spain	Europe	Disease	11			Guinea et al. 2022
IP31	2	oral	Single	Genetic diversity of C. albicans oral isolates recovered from healthy individuals	Morocco	Africa	Commensal	1			Sitterle et al 2019
IP30	2	oral	Single	Genetic diversity of C. albicans oral isolates recovered from healthy individuals	Brazil	South America	Commensal	1			Sitterle et al 2019
IP32	2	oral	Single	Genetic diversity of C. albicans oral isolates recovered from healthy individuals	France	Europe	Commensal	6			Sitterle et al 2019
IP15	2	right and left kidney aspirate	Unknown	Disribution of clinical Candida albicans in Manitoba	Canada	North America	Disease	1			This study
IP13	2	Abscess	Unknown	Disribution of clinical Candida albicans in Manitoba	Canada	North America	Disease	1		A sample has chr7	This study
IP12	2	Knee fluid	Unknown	Disribution of clinical Candida albicans in Manitoba	Canada	North America	Disease	1			This study
IP16	2	Urine	Unknown	Disribution of clinical Candida albicans in Manitoba	Canada	North America	Disease	3			This study
IP10	2	Neck tissue	Unknown	Disribution of clinical Candida albicans in Manitoba	Canada	North America	Disease	3			This study
IP14	2	Blood/Paraspinal fluid	Unknown	Disribution of clinical Candida albicans in Manitoba	Canada	North America	Disease	15			This study
IP11	2	Abdominal tissue	Unknown	Disribution of clinical Candida albicans in Manitoba	Canada	North America	Disease	15			This study
IP17	6	Urine	Serial	Disribution of clinical Candida albicans in Manitoba	Canada	North America	Disease	1,15		An isolate has chr1R, chr5L An isolate has chr5L,chr6 CNV,chr7 An isolate has chr7	This study

## Sheet: Sheet1
SRR1548194	PT1
SRR1548196	PT1
SRR1548198	PT1
SRR1548199	PT1
SRR1548200	PT1
SRR1548201	PT1
SRR1548205	PT1
SRR1548207	PT1
SRR1548209	PT1
SRR1548320	PT1
SRR1548333	PT1
SRR1553997	PT1
SRR1554081	PT1
SRR1554082	PT1
SRR1554083	PT1
SRR1554088	PT1
SRR1544628	PT59
SRR1544691	PT59
SRR1544681	PT59
SRR1544598	PT42
SRR1544616	PT42
SRR1544621	PT9
SRR1554178	PT9
SRR1554304	PT16
SRR1554297	PT16
SRR1554302	PT16
SRR1554300	PT16
SRR1554177	PT15
SRR1554174	PT15
SRR1554308	PT30
SRR1554310	PT30
SRR1554184	PT14
SRR1554292	PT14
SRR1554289	PT14
SRR1554296	PT43
SRR1554287	PT43
HSC014	PC_14_20
HSC020	PC_14_20
HSC028	PC_28_38
HSC038	PC_28_38
HSC105	PC_105_98
HSC098	PC_105_98
HSC043	PC_43_59
HSC059	PC_43_59
HSC046	PC_46_50
HSC050	PC_46_50
HSC077	PC_77_99
HSC099	PC_77_99
HSC081	PC_81_82
HSC082	PC_81_82
HSC199	PCT_324
HSC116	PCT_324
HSC122	PCT_324
HSC139	PCT_324
HSC156	PCT_324
HSC182	PCT_324
SRR11235411	PA1070
SRR11235412	PA1070
SRR21359717	811
SRR21359729	811
SRR21359712	811
SRR21359730	814
SRR21359723	814
SRR21359698	814
SRR21359731	814
SRR21359725	814
SRR21359713	830
SRR21359720	830
SRR21359709	833
SRR21359721	833
SRR21359728	833
SRR21359708	872
SRR21359724	872
SRR21359702	874
SRR21359714	874
SRR21359701	882
SRR21359695	882
SRR21359694	882
SRR25726575	CF02
SRR25726576	CF02
SRR25726577	CF02
SRR25726578	CF02
SRR25726579	CF02
SRR25726580	CF02
SRR25726581	CF02
SRR25726583	CF02
SRR25726584	CF02
SRR25726585	CF02
SRR25726586	CF02
SRR25726588	CF02
SRR25726589	CF02
SRR25726590	CF02
SRR25726591	CF02
SRR25726592	CF02
SRR7801925	CEC3663
SRR7801926	CEC3663
SRR7801919	CEC3621
SRR7801920	CEC3621
SRR7801921	CEC3636
SRR7801923	CEC3636
SRR23500803	1
SRR23500802	1
SRR23500627	1
SRR23500711	2
SRR23500604	2
SRR23500593	2
SRR23500528	9
SRR23500801	9
SRR23500790	11
SRR23500779	11
SRR23500704	12
SRR23500693	12
SRR23500614	15
SRR23500613	15
SRR23500612	15
SRR23500579	15
SRR23500578	15
SRR23500767	20
SRR23500756	20
SRR23500745	20
SRR23500638	20
SRR23500626	21
SRR23500615	21
SRR23500572	21
SRR23500561	24
SRR23500550	24
SRR23500667	24
SRR23500656	24
SRR23500645	24
SRR23500730	25
SRR23500723	25
SRR23500721	25
SRR23500720	25
SRR23500719	25
SRR23500714	36
SRR23500713	36
SRR23500712	36
SRR23500710	36
SRR23500709	40
SRR23500611	40
SRR23500610	44
SRR23500608	44
SRR23500607	44
SRR23500574	46
SRR23500573	46
SRR23500570	46
SRR23500569	48
SRR23500568	48
SRR23500606	53
SRR23500605	53
SRR23500603	55
SRR23500602	55
SRR23500601	60
SRR23500600	60
SRR23500599	61
SRR23500598	61
SRR23500597	61
SRR23500596	62
SRR23500595	62
SRR23500592	63
SRR23500591	63
SRR23500590	64
SRR23500589	64
SRR23500588	64
SRR23500587	64
SRR23500586	64
SRR23500585	64
SRR23500566	65
SRR23500565	65
SRR23500564	65
SRR23500563	65
SRR23500581	67
SRR23500580	67
SRR23500547	67
SRR23500546	67
SRR23500545	67
SRR23500544	67
SRR23500542	68
SRR23500541	68
SRR23500540	69
SRR23500538	69
SRR23500537	69
SRR23500536	72
SRR23500535	72
SRR23500534	72
SRR23500533	72
SRR23500562	74
SRR23500560	74
SRR23500559	74
SRR23500558	76
SRR23500556	76
SRR23500555	80
SRR23500554	80
SRR23500553	80
SRR23500525	85
SRR23500524	85
SRR23500523	85
SRR23500522	85
SRR23500521	85
SRR23500520	85
SRR23500552	92
SRR23500551	92
SRR23500798	97
SRR23500797	97
SRR23500548	103
SRR23500675	103
SRR23500674	105
SRR23500673	105
SRR23500671	107
SRR23500670	107
SRR23500796	111
SRR23500795	111
SRR23500794	111
SRR23500793	111
SRR23500792	112
SRR23500789	112
SRR23500788	113
SRR23500787	113
SRR23500784	115
SRR23500783	115
SRR23500781	120
SRR23500780	120
SRR23500777	122
SRR23500776	122
SRR23500775	122
SRR23500774	122
SRR23500773	122
SRR23500772	125
SRR23500707	125
SRR23500706	125
SRR23500705	125
SRR23500703	125
SRR23500666	126
SRR23500665	126
SRR23500664	126
SRR23500663	126
SRR23500662	126
SRR23500661	126
SRR23500702	127
SRR23500701	127
SRR23500700	127
SRR23500699	127
SRR23500698	127
SRR23500697	127
SRR23500696	135
SRR23500695	135
SRR23500692	137
SRR23500691	137
SRR23500690	137
SRR23500687	138
SRR23500686	138
SRR23500685	140
SRR23500684	140
SRR23500683	140
SRR23500680	142
SRR23500679	142
SRR23500678	142
SRR23500659	144
SRR23500658	144
SRR23500677	146
SRR23500676	146
SRR23500771	149
SRR23500770	149
SRR23500769	149
SRR23500768	153
SRR23500766	153
SRR23500765	153
SRR23500764	153
SRR23500763	153
SRR23500762	162
SRR23500761	162
SRR23500652	168
SRR23500651	168
SRR23500650	172
SRR23500649	172
SRR23500648	172
SRR23500758	182
SRR23500757	182
SRR23500751	184
SRR23500750	184
SRR23500749	184
SRR23500748	184
SRR23500747	184
YST7V1	YST7
YST7V2	YST7
YST7V3	YST7
YST7V4	YST7
YST7V5	YST7
YST7V6	YST7
YST7V7	YST7
YST7V8	YST7
YST7V9	YST7
YST7V10	YST7
YST7V11	YST7
YST7V12	YST7
YST7R1	YST7
YST7R2	YST7
YST7R3	YST7
YST7R4	YST7
YST7R5	YST7
YST7R6	YST7
YST7R7	YST7
YST7R8	YST7
YST7R9	YST7
YST7R10	YST7
YST7R11	YST7
TVY10V1	TVY10
TVY10V2	TVY10
TVY10V3	TVY10
TVY10V4	TVY10
TVY10V5	TVY10
TVY10V6	TVY10
TVY10V7	TVY10
TVY10V8	TVY10
TVY10V9	TVY10
TVY10V10	TVY10
TVY10V11	TVY10
TVY10V12	TVY10
TVY10R1	TVY10
TVY10R2	TVY10
TVY10R3	TVY10
TVY10R4	TVY10
TVY10R5	TVY10
TVY10R6	TVY10
TVY10R7	TVY10
TVY10R8	TVY10
TVY10R9	TVY10
TVY10R10	TVY10
TVY10R11	TVY10
TVY4V1	TVY4
TVY4V2	TVY4
TVY4V3	TVY4
TVY4V4	TVY4
TVY4V5	TVY4
TVY4V6	TVY4
TVY4V7	TVY4
TVY4V8	TVY4
TVY4V9	TVY4
TVY4V10	TVY4
TVY4V11	TVY4
TVY4V12	TVY4
TVY4R1	TVY4
TVY4R2	TVY4
TVY4R3	TVY4
TVY4R4	TVY4
TVY4R5	TVY4
TVY4R6	TVY4
TVY4R7	TVY4
TVY4R8	TVY4
TVY4R9	TVY4
TVY4R10	TVY4
TVY4R11	TVY4
SRR14902701	CA-66
SRR14902703	CA-34
SRR14902704	CA-34
SRR14902706	CA-371
SRR14902708	CA-371
SRR14902709	CA-371
SRR14902710	CA-35
SRR14902711	CA-35
SRR14902728	CA-66

## Sheet: Sheet2
Evolution of resistance in sequenctial clinical isolates in HIV patients
Disribution of clinical Candida albicans in Manitoba
Diversity of isolates from individuals with RVVC
Within host evolution of clinical isolates
Analyses of commensal isolates from healthy individuals
Candida albicans adaptive growth in the cystic fibrosis lung environment
Genetic diversity of C. albicans oral isolates recovered from healthy individuals
Mother to child transmission of oral isolates
Candedimia outbeak in neonates
